# Supplementary material for: Registries and collaborative studies for primary ciliary dyskinesia in Europe
Source: PubMed Central journal article supplement — ERJ Open Res. 2020 May 26;6(2):00005-2020. doi: 10.1183/23120541.00005-2020 (PMC7248350; doi:10.1183/23120541.00005-2020), 2020-05-26
Supplement: 00005-2020.SUPPLEMENT.pdf [file 00005-2020.SUPPLEMENT.pdf]

Supplementary Table 1: National and international centres that contribute data to the iPCD Cohort (marked with \*) and/or the International PCD Registry (marked with #):

| <b>Country</b>        | <b>Centres</b>                                                                                                                                                                                                                                                                                                                                                                                                                                                                                                                                                                                                   |
|-----------------------|------------------------------------------------------------------------------------------------------------------------------------------------------------------------------------------------------------------------------------------------------------------------------------------------------------------------------------------------------------------------------------------------------------------------------------------------------------------------------------------------------------------------------------------------------------------------------------------------------------------|
| <b>Argentina</b>      | Centro Respiratorio, Hospital de Niños Ricardo Gutierrez, Buenos Aires (Prof S Scigliano)*                                                                                                                                                                                                                                                                                                                                                                                                                                                                                                                       |
| <b>Australia</b>      | Dept of Respiratory Medicine, Concord Hospital Clinical School, University of Sydney, Sydney (Prof Lucy Morgan)*                                                                                                                                                                                                                                                                                                                                                                                                                                                                                                 |
| <b>Austria</b>        | Medical University of Vienna (MedUni Wien), Vienna, Austria (Z Szepefalusi, S Diesner)#                                                                                                                                                                                                                                                                                                                                                                                                                                                                                                                          |
| <b>Belgium</b>        | Dept of Paediatrics, University Hospital Gasthuisberg, Leuven, Belgium (Dr M Boon)*#                                                                                                                                                                                                                                                                                                                                                                                                                                                                                                                             |
| <b>Canada</b>         | University of Alberta, Canada (I Amirav)#                                                                                                                                                                                                                                                                                                                                                                                                                                                                                                                                                                        |
| <b>Colombia</b>       | Departamento de Pediatría, Fundación Santa Fe, Clínica de Neumología Pediátrica Compensar, Bogotá (Prof S. Ucros)*                                                                                                                                                                                                                                                                                                                                                                                                                                                                                               |
| <b>Cyprus</b>         | Medical School, University of Cyprus, Nicosia, Cyprus (Prof P Yiallourou)*#                                                                                                                                                                                                                                                                                                                                                                                                                                                                                                                                      |
| <b>Czech Republic</b> | Pediatric Department, Charles University Prague and University Hospital Motol, Prague, Czech Republic (Prof P Pohunek)*#                                                                                                                                                                                                                                                                                                                                                                                                                                                                                         |
| <b>Denmark</b>        | Danish PCD Centre Copenhagen, Paediatric Pulmonary Service, Copenhagen University Hospital, Copenhagen, Denmark (Prof KG Nielsen)*#                                                                                                                                                                                                                                                                                                                                                                                                                                                                              |
| <b>France</b>         | - RespiRare- Service de Pneumologie Pédiatrique, Hopital Armand Trousseau, Sorbonne Université, Paris (Prof A. Clement, Dr G. Thouvenin)*#<br>- RespiRare- Hopital intercommunal de Créteil, Service de Pneumologie, DHU ATVB, Université Paris Est Créteil (Prof B. Maitre)*                                                                                                                                                                                                                                                                                                                                    |
| <b>Germany</b>        | - Dept of General Paediatrics and Adolescent Medicine, University Hospital Muenster, Muenster (Prof H Omran)*#<br>- Dept of Paediatric Pneumology, University Children's Hospital of Ruhr University Bochum, Bochum (Dr C Koerner-Rettberg)*#<br>- Clinic for Paediatric Pulmonology, Allergology and Neonatology, Hannover Medical School, Hannover (Dr M Wetzke, Dr Nicolaus Schwerk)*#<br>- Hannover Medical School (MHH), Hannover (Dr F Ringshausen)#<br>- Dept of Paediatric Pulmonology, University Clinic Heidelberg, Heidelberg (Prof A Kulozik)#<br>- University Clinic Giessen, Giessen (L Nährlich)# |
| <b>Greece</b>         | Paediatric Pulmonology, 3rd Dept of Paediatrics, National and Kapodistrian University of Athens, School of Medicine, Attikon University Hospital, Athens (Prof K Priftis)*#                                                                                                                                                                                                                                                                                                                                                                                                                                      |
| <b>Israel</b>         | PCD Israeli Consortium, Dept of Pediatrics, Faculty of Medicine, Bar Ilan University, Ramat Gan (Prof I. Amirav)*                                                                                                                                                                                                                                                                                                                                                                                                                                                                                                |
| <b>Italy</b>          | - PCD Italian Consortium, Department of Paediatrics, University of Padova, Padova (Prof A. Barbato, Dr D. Snijders)*#<br>- Aou Federico II University, Naples, Italy (UNINA) (Prof Fr Santamaria)*#<br>- Pediatrics department-PCD centre-Pisa, Pisa, Italy (M Pifferi)#                                                                                                                                                                                                                                                                                                                                         |
| <b>Netherlands</b>    | Dept of Pediatric Pulmonology, VU University Medical Center, Amsterdam, The Netherlands (Dr EG Haarman)*#                                                                                                                                                                                                                                                                                                                                                                                                                                                                                                        |
| <b>Norway</b>         | Unit for Paediatric Heart, Lung, Allergic Diseases, Rikshospitalet, Oslo (Dr S. Crowley)*                                                                                                                                                                                                                                                                                                                                                                                                                                                                                                                        |
| <b>Poland</b>         | Department of Pneumonology and Cystic Fibrosis, Institute of Tuberculosis and Lung Disorders, ul.Prof.Rudnika 3b, 34-700 Rabka – Zdrój (Dr H. Mazurek)*                                                                                                                                                                                                                                                                                                                                                                                                                                                          |
| <b>Serbia</b>         | Children's Hospital for Lung Diseases and TB, Medical Centre "Dr Dragisa Misovic", Belgrade (Prof Z. Zivkovic)*                                                                                                                                                                                                                                                                                                                                                                                                                                                                                                  |

|                                                                        |                                                                                                                                                                                                                                                                                                                                                                                                                                                                                                                                                                                                        |
|------------------------------------------------------------------------|--------------------------------------------------------------------------------------------------------------------------------------------------------------------------------------------------------------------------------------------------------------------------------------------------------------------------------------------------------------------------------------------------------------------------------------------------------------------------------------------------------------------------------------------------------------------------------------------------------|
| <b>Slovakia</b>                                                        | Paediatric Department University Hospital Martin Slovakia (P Durdik)#                                                                                                                                                                                                                                                                                                                                                                                                                                                                                                                                  |
| <b>Spain</b>                                                           | - Hospital Universitari Vall d Hebron Barcelona (Vall d´Hebron), Barcelona (A Moreno-Galdó, S Rovira Amigo)#<br>- Paediatric Pneumology Unit, University Clinic Hospital, University of Valencia, Valencia (Dr T. Romero-Rubio)*                                                                                                                                                                                                                                                                                                                                                                       |
| <b>Switzerland</b>                                                     | Swiss PCD Registry (CH-PCD), Institute of Social and Preventive Medicine University of Bern (Prof CE. Kuehni, Dr M. Goutaki)*#                                                                                                                                                                                                                                                                                                                                                                                                                                                                         |
| <b>Turkey</b>                                                          | - Dept of Paediatric Pulmonology, Marmara University, School of Medicine, Istanbul (Prof B. Karadag)*#<br>- Department of Pediatric Pulmonology, Hacettepe University Faculty of Medicine, Ankara (Prof U. Özçelik)*                                                                                                                                                                                                                                                                                                                                                                                   |
| <b>United Kingdom</b>                                                  | - Primary Ciliary Dyskinesia Centre, NIHR Southampton Respiratory Biomedical Research Unit, University of Southampton and University Hospital Southampton NHS Foundation Trust, Southampton (Prof JS Lucas)*#<br>- Dept of Paediatrics, Primary Ciliary Dyskinesia Centre, Royal Brompton and Harefield Foundation Trust, London (Prof C Hogg, Dr S Carr)*#<br>- Host Defence Unit, Royal Brompton and Harefield NHS Foundation Trust, London (Dr M. Loebinger)*<br>- Department of Infection, Immunity and Inflammation, Institute for Lung Health, University of Leicester, Leicester (Dr R. Hirst)* |
| <b>United States</b>                                                   | University of North Carolina at Chapel Hill/PCD Foundation's Clinical & Research Centers Network, Chapel Hill, North Carolina, United States of America (Prof M Leigh)*#                                                                                                                                                                                                                                                                                                                                                                                                                               |
| <b>Multinational collaborative networks (Canada and United States)</b> | PCD Foundation's Clinical & Research Centers Network (Prof M. Leigh)*                                                                                                                                                                                                                                                                                                                                                                                                                                                                                                                                  |

---

PCD: Primary Ciliary Dyskinesia
